# Supplementary material
Source: PubMed Central journal article supplement (PMC9308732)
Supplement: NIHMS1813815-supplement-320877_Major_Resources_Table.pdf [file NIHMS1813815-supplement-320877_Major_Resources_Table.pdf]

## Major Resources Table

In order to allow validation and replication of experiments, all essential research materials listed in the Methods should be included in the Major Resources Table below. Authors are encouraged to use public repositories for protocols, data, code, and other materials and provide persistent identifiers and/or links to repositories when available. Authors may add or delete rows as needed.

### Animals (in vivo studies)

| Species        | Vendor or Source | Background Strain | Sex | Persistent ID / URL |
|----------------|------------------|-------------------|-----|---------------------|
| Not applicable |                  |                   |     |                     |

### Genetically Modified Animals

|                 | Species        | Vendor or Source | Background Strain | Other Information | Persistent ID / URL |
|-----------------|----------------|------------------|-------------------|-------------------|---------------------|
| Parent - Male   | Not applicable |                  |                   |                   |                     |
| Parent - Female | Not applicable |                  |                   |                   |                     |

### Antibodies

| Target antigen | Vendor or Source | Catalog # | Working concentration | Lot # (preferred but not required) | Persistent ID / URL |
|----------------|------------------|-----------|-----------------------|------------------------------------|---------------------|
| Not applicable |                  |           |                       |                                    |                     |

### DNA/cDNA Clones

| Clone Name     | Sequence | Source / Repository | Persistent ID / URL |
|----------------|----------|---------------------|---------------------|
| Not applicable |          |                     |                     |

### Cultured Cells

| Name           | Vendor or Source | Sex (F, M, or unknown) | Persistent ID / URL |
|----------------|------------------|------------------------|---------------------|
| Not applicable |                  |                        |                     |

### Data & Code Availability

| Description                         | Source / Repository                                                                                                          | Persistent ID / URL                                                                     |
|-------------------------------------|------------------------------------------------------------------------------------------------------------------------------|-----------------------------------------------------------------------------------------|
| Cardiovascular Health Study dataset | National Heart, Lung, and Blood Institute / Biologic Specimen and Data Repository Information Coordinating Center (BioLINCC) | <a href="https://biolincc.nhlbi.nih.gov/home/">https://biolincc.nhlbi.nih.gov/home/</a> |
|                                     |                                                                                                                              |                                                                                         |

### Other

| Description                    | Source / Repository | Persistent ID / URL                                                                                                                                                                |
|--------------------------------|---------------------|------------------------------------------------------------------------------------------------------------------------------------------------------------------------------------|
| Human IL-6 Quantikine HS ELISA | R & D systems       | HS600C / <a href="https://www.rndsystems.com/products/human-il-6-quantikine-hs-elisa-kit_hs600c">https://www.rndsystems.com/products/human-il-6-quantikine-hs-elisa-kit_hs600c</a> |
|                                |                     |                                                                                                                                                                                    |
